# Supplementary material for: Polymyxins and quinazolines are LSD1/KDM1A inhibitors with unusual structural features
Source: PubMed Central journal article supplement — Sci Adv. 2016 Sep 9;2(9):e1601017. doi: 10.1126/sciadv.1601017 (PMC5017823; doi:10.1126/sciadv.1601017), 2016-09-09
Supplement: 1601017_SM.pdf [file 1601017_SM.pdf]

## Supplementary Materials for **Polymyxins and quinazolines are LSD1/KDM1A inhibitors with unusual structural features**

Valentina Speranzini, Dante Rotili, Giuseppe Ciossani, Simona Pilotto, Biagina Marrocco, Marianonietta Forgione, Alessia Lucidi, Federico Forneris, Parinaz Mehdipour, Sameer Velankar, Antonello Mai, Andrea Mattevi

Published 9 September 2016, *Sci. Adv.* **2**, e1601017 (2016)

DOI: 10.1126/sciadv.1601017

### **This PDF file includes:**

- Supplementary Materials and Methods
- fig. S1. Cellular characterization of LSD1 reversible inhibitors.
- fig. S2. Comparison of polymyxin B and polymyxin E conformations from multiple data sets.
- fig. S3. Characterization of the binding of **E11** to LSD1-CoREST in solution by isothermal titration calorimetry.
- fig. S4. Noncovalent quinazoline-derived compound **MC3767** binds the LSD1 active site in a multiple stacking assembly as **E11**.
- fig. S5. Workflow of the PDB search for multicopy stacking small-molecule inhibitors.
- fig. S6. Comparison of histone methyltransferase G9a-like protein (GLP) and histone demethylase LSD1 in complex with compound **E11**.
- fig. S7. LSD1 druggable space is expanded by the binding of noncovalent compounds.
- table S1. Diffraction, data collection, and refinement statistics.
- table S2. Diffraction, data collection, and refinement statistics for all data sets of polymyxins B and E.
- table S3. List of protein inhibitor structures displaying multiple stacking conformation identified from PDB search.
- table S4. List of published LSD1 PDB structures in complex with ligands.
- References (37–55)

## Supplementary Materials and Methods

**Cell viability.** Cell viability assays were performed seeding MV4-11 in 96-well plate followed by treatment in triplicate with increasing concentrations of inhibitor compounds (range 15-100000 nM). Plates were then incubated at 37°C with 5% CO<sub>2</sub> for 4 days. On day 4, Alamar Blue (Life Technologies) was added to the cells and, after 3 hours incubation, its fluorescence was detected using a TECAN Freedom Evo plate reader (540-570 nm excitation wavelength, 580-610 nm emission wavelength, Tecan Trading AG, Switzerland). Percentage of viability of treated cells relative to vehicle was calculated as following: % of cell viability = (average of the triplicates for each treated sample – average background signal) / (average of the triplicates of the vehicle control sample – average background signal).

**Cell growth analysis.** MV4-11 cells were grown in RPMI supplemented with 10% FBS serum, 2 mM L-glutamine and antibiotics, treated with the desired compounds, and counted after 24 hours, 3 days, and 5 days of treatment with trypan blue.

**Transcriptional analysis: quantitative PCR.** Total RNA was purified using RNeasy Mini Kit (Qiagen, Valencia, CA), quantified and reverse transcribed. 5-10 ng of cDNA were used to perform quantitative PCR (qPCR) using SYBR Green Reaction Mix (Perkin Elmer, Boston, MA). Gfi1-B mRNA level was normalized against rPPO mRNA.

**Immunoblotting.** MV4-11 cells were treated at different concentrations (200 nM and 1 μM) of **MC2694**, **E11**, **MC2580** and polymyxin E. Whole cell lysates were subjected to SDS-PAGE, and then

immunoblotted using antibodies against different histone modifications (H3K4me2, H3K9me2, and H3 – Abcam, Cambridge, UK).

***PDB search of stacking ligands.*** The whole Protein Data Bank was searched to identify protein-ligand complexes with stacking assemblies similar to compounds **E11** and **MC3767**. Initial criteria were set as follows: 1) more than 3 copies of the same ligand had to be in the active site, 2) the ligand had to have more than 10 non-hydrogen atoms, 3) the ligands had to be within 4 Å from protein residues and 4) the ligand had not to be one of the most common cofactors, identified by none of the three letter codes 'HEM' (Fe-containing protoporphirin IX, heme), 'HEC' (heme C), 'BCL' (bacteriochlorophyll A), 'FAD' (flavin-adenine dinucleotide), 'NAD' (nicotinamide-adenine dinucleotide), 'CLA' (chlorophyll A), 'NDP' (NADPH dihydro-nicotinamide-adenine dinucleotide phosphate). This search returned 599 hits, whose structures were examined individually, resulting in overall reduction to 13 by removal of: 1) non-drug candidates (lipids, detergents, vitamins, polymers, dyes, co-factors, sugars, buffer molecules, AMP, GMP, analogs and derivatives), 2) single-copy ligands found in multimeric biological assemblies, 3) ligands modeled in multiple conformations, and 4) crystallization artifacts (inferred both by PDB analysis and by original work comments).

***G9a inhibition by MC2694.*** Inhibition of human G9a by **MC2694** was measured following the protocol described in (37).

***Chemistry of E11, MC2694, MC3767, MC4120, MC4121.*** Melting points were determined on a Stuart™ melting point apparatus SMP10. <sup>1</sup>H-NMR spectra were recorded at 400 MHz using a Bruker AC 400 spectrometer; chemical shifts are reported in δ (ppm) units relative to the internal reference tetramethylsilane (Me<sub>4</sub>Si). Microwave-assisted reactions were performed with a Biotage Initiator™

(Uppsala, Sweden) high frequency microwave synthesizer working at 2.45 GHz, fitted with magnetic stirrer and sample processor; reaction vessels were Biotage microwave glass vials sealed with applicable cap; temperature was controlled through the internal IR sensor of the microwave apparatus. Mass spectra were recorded on an API-TOF Mariner by Perspective Biosystem (Stratford, Texas, USA), samples were injected by a Harvard pump using a flow rate of 5–10  $\mu\text{L}/\text{min}$ , infused in the Electrospray system. All compounds were routinely checked by TLC and  $^1\text{H-NMR}$ . TLC was performed on aluminum-backed silica gel plates (Merck DC, Alufolien Kieselgel 60 F<sub>254</sub>) with spots visualized by UV light or using a  $\text{KMnO}_4$  alkaline solution. All solvents were reagent grade and, when necessary, were purified and dried by standard methods. Concentration of solutions after reactions and extractions involved the use of a rotary evaporator operating at reduced pressure of  $\sim 20$  Torr. Organic solutions were dried over anhydrous sodium sulfate. All chemicals were purchased from Sigma Aldrich s.r.l., Milan (Italy) or from TCI Europe N.V., Zwijndrecht (Belgium), and were of the highest purity. As a rule, samples prepared for physical and biological studies were dried in high vacuum over  $\text{P}_2\text{O}_5$  for 20 hours at temperatures ranging from 25 to 40°C, depending on the sample melting point.

Compound **MC2694** was prepared as previously reported (**37**). Compounds **E11** and **MC3767** were synthesized in two steps starting from the corresponding 2,4-dichloro-6,7-dimethoxyquinazoline **1**, which was prepared according to the procedure described in literature (**38**). Nucleophilic substitution using the proper commercial amine nucleophiles gave access to the 4-substituted 2-chloroquinazoline intermediates **MC4120** and **MC4121**, which were further heated with commercially available 3-(dimethylamino)propylamine under microwave irradiation to afford the target 2,4-diaminoquinazolines compounds **E11** and **MC3767**.

*Preparation of N4-(1-benzylpiperidin-4-yl)-N2-(3-(dimethylamino)propyl)-6,7-dimethoxyquinazoline-2,4-diamine (E11).* 4-Amino-1-benzylpiperidine (0.59 mL, 2.89 mmol, 3 eq.) was added to a solution of 2,4-dichloro-6,7-dimethoxyquinazoline **1** (0.25 g, 0.96 mmol, 1 eq.) in dry THF (5.5 mL) and the resulting mixture was stirred at room temperature for 24 hours until TLC showed that the starting material had disappeared. After filtration of the white salt, the filtrate was evaporated under reduced pressure and the resulting crude was triturated with petroleum ether, collected by filtration, and finally purified by a silica gel column eluting with a mixture AcOEt:MeOH (40:1) to get the intermediate **MC4120** as a white powder, yield 92%. M.p. 180-181°C: <sup>1</sup>H-NMR (400MHz; DMSO) δ ppm 1.63-1.72 (m, 2H, 2 x CH piperidine ring), 1.89-1.92 (m, 2H, 2 x CH piperidine ring), 2.05-2.11 (m, 2H, 2 x CH piperidine ring), 2.87-2.90 (m, 2H, 2 x CH piperidine ring), 3.51 (s, 2H, NCH<sub>2</sub>Ph), 3.88 (s, 3H, OCH<sub>3</sub>), 3.89 (s, 3H, OCH<sub>3</sub>), 4.09-4.13 (broad, 1H, NHC<sub>4</sub>-H-piperidine ring), 7.06 (s, 1H, CH quinazoline ring), 7.24-7.27 (m, 1H, CH phenyl ring), 7.31-7.36 (m, 4H, CH phenyl rings), 7.64 (s, 1H, CH quinazoline ring), 8.01 (d, 1H, NH). MS (ESI) 413 [M + H]<sup>+</sup>. *N*-(1-Benzylpiperidin-4-yl)-2-chloro-6,7-dimethoxyquinazolin-4-amine **MC4120** (100 mg, 0.24 mmol, 1 eq.) was dissolved in 1 mL of isopropyl alcohol. To this solution was added 3-(dimethylamino)propylamine (67 μL, 0.52 mmol, 2.2 eq.) and the resulting solution was heated using microwave irradiation to 130°C for 4 hours and 30 minutes. After cooling, TLC indicated the completion of the reaction. After removal of the solvent by rotary evaporation, the residue was suspended in water (7 mL) and extracted with AcOEt (6 x 10 mL). The combined organic phases were then washed with brine (1 x 3 mL) and dried over Na<sub>2</sub>SO<sub>4</sub>. After filtration, the solvent was removed under vacuum and the product was purified by an alumina column eluting with a mixture AcOEt:MeOH (15:1) to afford **E11** as a white powder, yield 65%. M.p. 102-103°C: <sup>1</sup>H-NMR (400MHz; DMSO) δ ppm 1.64-1.73 (m, 4H, 2 x CH piperidine ring and NHCH<sub>2</sub>CH<sub>2</sub>CH<sub>2</sub>N(CH<sub>3</sub>)<sub>2</sub>), 2.06-2.12 (m, 2H, 2 x CH piperidine ring), 2.28-2.31 (t, 2H, NHCH<sub>2</sub>CH<sub>2</sub>CH<sub>2</sub>N(CH<sub>3</sub>)<sub>2</sub>), 2.92-2.95 (m, 2H, 2 x CH piperidine ring), 3.28-3.32 (m, 2H,

NHCH<sub>2</sub>CH<sub>2</sub>CH<sub>2</sub>N(CH<sub>3</sub>)<sub>2</sub>, 3.57 (s, 2H, NCH<sub>2</sub>Ph), 3.85 (s, 3H, OCH<sub>3</sub>), 3.86 (s, 3H, OCH<sub>3</sub>), 4.12-4.16 (broad m, 1H, NHC<sub>4</sub>-H-piperidine ring), 6.19 (broad t, 1H, NHCH<sub>2</sub>CH<sub>2</sub>CH<sub>2</sub>N(CH<sub>3</sub>)<sub>2</sub>), 6.71 (s, 1H, CH quinazoline ring), 7.22 (broad d, 1H, NH), 7.29-7.33 (m, 1H, CH phenyl ring), 7.35-7.41 (m, 4H, CH phenyl rings), 7.47 (s, 1H, CH quinazoline ring). MS (ESI) 479 [M + H]<sup>+</sup>.

*Preparation of N<sup>2</sup>-(3-(dimethylamino)propyl)-6,7-dimethoxy-N<sup>4</sup>,N<sup>4</sup>-dimethylquinazoline-2,4-diamine (MC3767).* A 2.0 M solution of dimethylamine in THF (2.03 mL, 4.05 mmol, 3 eq.) was added to a solution of 2,4-dichloro-6,7-dimethoxyquinazoline **1** (0.35 g, 1.35 mmol, 1 eq.) in dry THF (8.0 mL) and the resulting mixture was stirred at room temperature for 1 h 30 min until TLC showed that the starting material had disappeared. After filtration of the white salt, the filtrate was evaporated under reduced pressure and the resulting crude was triturated with petroleum ether, collected by filtration, and finally purified by a silica gel column eluting with a mixture AcOEt:Hexane (1:1) to get the intermediate **MC4121** as a white powder, yield 90%. M.p. 173-174°C: <sup>1</sup>H-NMR (400MHz; DMSO) δ ppm 3.32 (s, 6H, N(CH<sub>3</sub>)<sub>2</sub>), 3.89 (s, 3H, OCH<sub>3</sub>), 3.90 (s, 3H, OCH<sub>3</sub>), 7.12 (s, 1H, CH quinazoline ring), 7.40 (s, 1H, CH quinazoline ring). MS (ESI) 268 [M + H]<sup>+</sup>. *N*-(Dimethyl)-2-chloro-6,7-dimethoxyquinazolin-4-amine **MC4121** (200 mg, 0.75 mmol, 1 eq.) was dissolved in 2.4 mL of isopropyl alcohol. To this solution was added 3-(dimethylamino)propylamine (0.11 mL, 0.90 mmol, 1.2 eq.) and sodium iodide (112 mg, 0.75 mmol, 1 eq.) and the resulting solution was heated using microwave irradiation to 130 °C for 3 h. After cooling, TLC indicated the completion of the reaction. After removal of the solvent by rotary evaporation, the residue was suspended in water (5 mL) and extracted with AcOEt (10 x 8 mL). The combined organic phases were then dried over Na<sub>2</sub>SO<sub>4</sub>. After filtration, the solvent was removed under vacuum and the product was purified by an alumina column eluting with a mixture AcOEt:MeOH (20:1) to afford **3** as a white powder, yield 60%. M.p. 65-66°C: <sup>1</sup>H-NMR (400MHz; DMSO) δ ppm 1.64-1.68 (m, 2H, NHCH<sub>2</sub>CH<sub>2</sub>CH<sub>2</sub>N(CH<sub>3</sub>)<sub>2</sub>), 2.24-2.27 (t, 2H,

NHCH<sub>2</sub>CH<sub>2</sub>CH<sub>2</sub>N(CH<sub>3</sub>)<sub>2</sub>), 3.13 (s, 6H, N(CH<sub>3</sub>)<sub>2</sub>), 3.29-3.31 (m, 2H, NHCH<sub>2</sub>CH<sub>2</sub>CH<sub>2</sub>N(CH<sub>3</sub>)<sub>2</sub>), 3.79 (s, 3H, OCH<sub>3</sub>), 3.84 (s, 3H, OCH<sub>3</sub>), 6.32 (t, 1H, NHCH<sub>2</sub>CH<sub>2</sub>CH<sub>2</sub>N(CH<sub>3</sub>)<sub>2</sub>), 6.75 (s, 1H, CH quinazoline ring), 7.14 (s, 1H, CH quinazoline ring). MS (ESI) 334 [M + H]<sup>+</sup>.

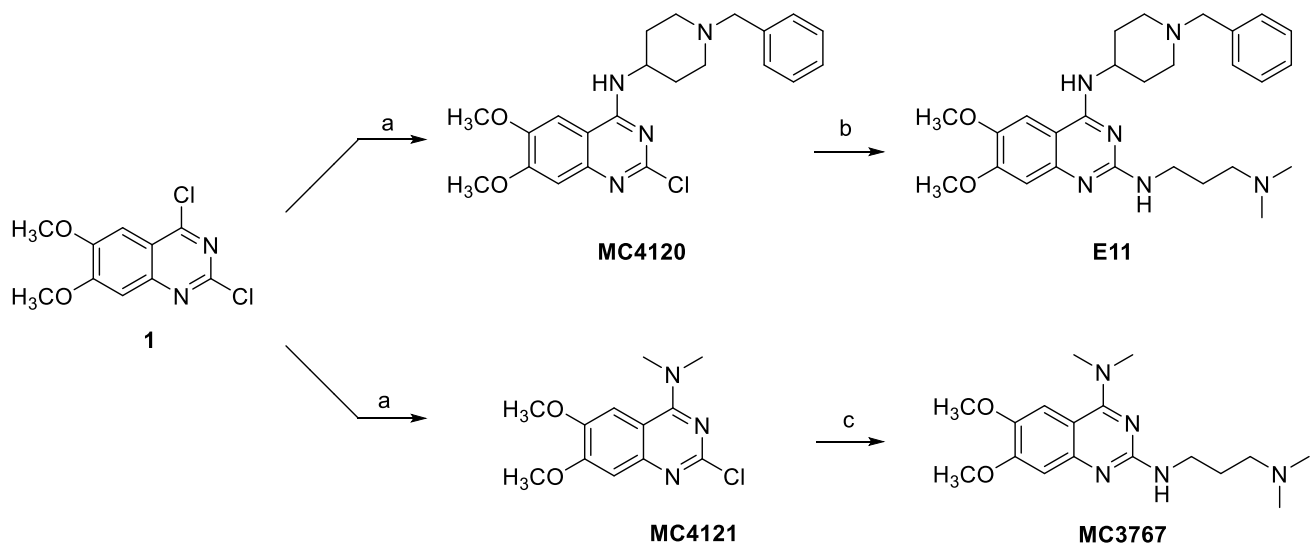

Reagents and conditions: (a) proper amine, dry THF, RT; (b) *N,N*-dimethylpropane-1,3-diamine, *i*-PrOH, microwave 130 °C; (c) *N,N*-dimethylpropane-1,3-diamine, NaI, *i*-PrOH, microwave 130 °C.

## Supplementary Figures

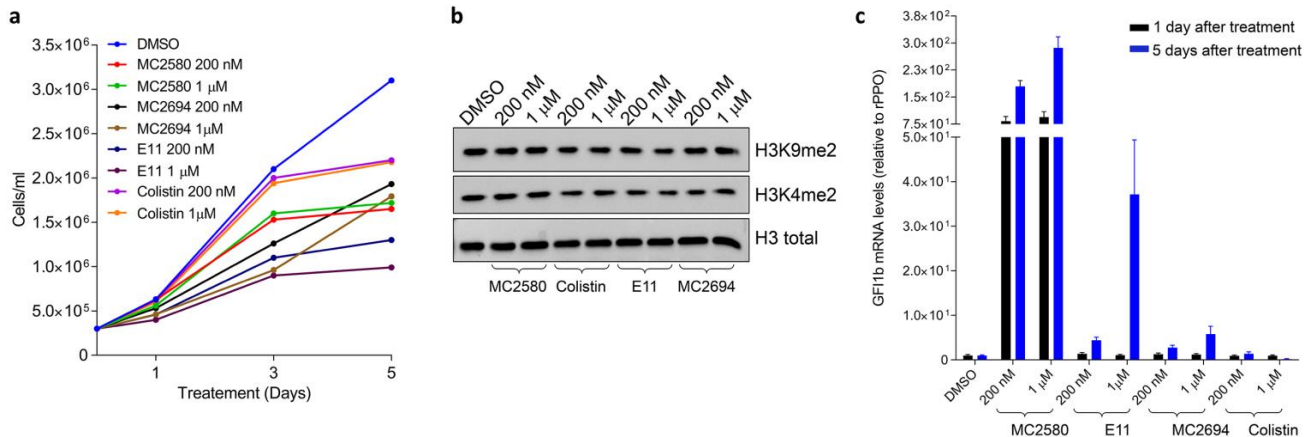

**fig. S1. Cellular characterization of LSD1 inhibitors.** Acute myeloid leukemia was chosen as model because LSD1 inhibitors are emerging as very attractive drugs against this hematological malignancy. Reference compound **MC2580** was chosen as positive control as it is a well-characterized potent LSD1 inhibitor. **(a)** **MC2580** arrests cell growth of MV4-11 cells by  $\approx 50\%$ , without clear dose dependence. Compound **MC2694** behaves similarly, while **E11** is stronger in inhibiting cell growth than reference **MC2580**. Polymyxin E (colistin) is instead a weaker inhibitor, although this observation might be due to reduced permeability. With increasing concentrations up to 50-times the measured  $K_d$  values (10  $\mu\text{M}$ ), compounds **MC2694** and **E11** showed 100% cytotoxic. These results indicated that the cytotoxicity is unlikely to be only caused by LSD1 inhibition but rather originates from a combination of effects, which might reflect also their activity on G9a. **(b)** Analysis of methylation levels of histone H3 Lysine 4 (H3K4me2) and Lysine 9 (H3K9me2) marks in leukemia MV4-11 cells upon treatment with reference inhibitor **MC2580**, polymyxin E, and the two most potent quinazoline derivatives. None of the compounds induced any significant up-regulation of H3K4me2 over the baseline levels. **(c)** Transcriptional effect of quinazoline derivatives and polymyxin E (colistin) as tested by qPCR. Expression levels of *Gfi1-B* were analyzed as an established target of LSD1 in MV4-11 cells. At earliest time points (24h), reference compound **MC2580** is the only one able to increase expression, whereas at later time points (shown is 5 days treatment) also **E11** is able to induce significantly *Gfi1-B*.



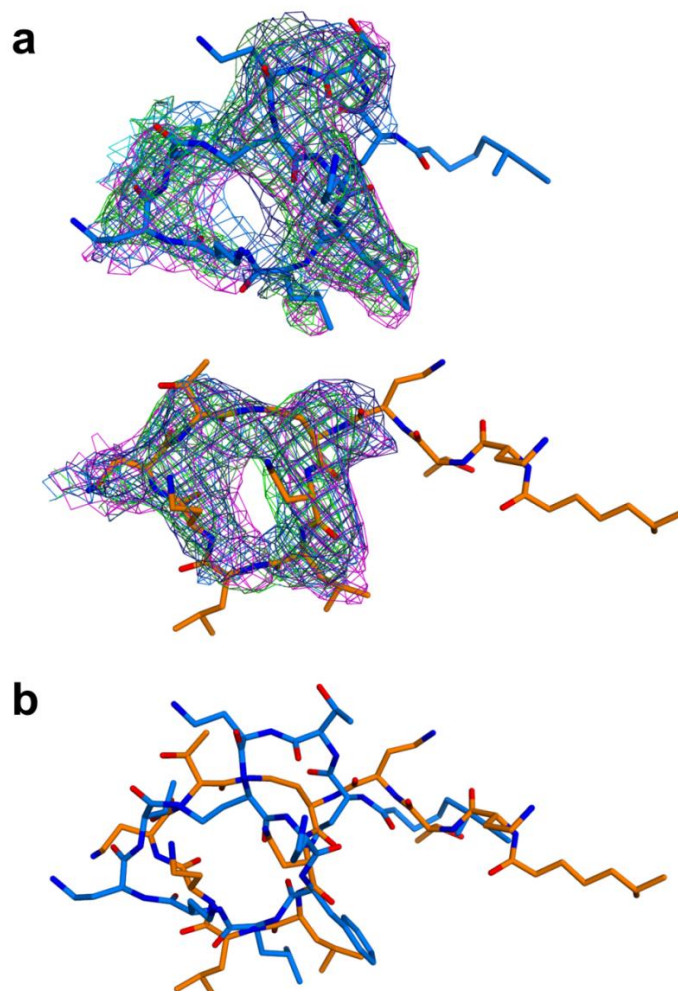

**fig. S2. Comparison of polymyxin B and polymyxin E conformations from multiple data sets. (a)** Superposition of 2F<sub>o</sub>-F<sub>c</sub> experimental electron densities of polymyxins B and E from multiple data sets (see table S2). Polymyxin B (blue sticks) and E (orange sticks) central rings position in a well-defined electron density, whereas the extended aliphatic side chain is in a flexible conformation not visible in any of the collected data sets. Superpositions of electron density maps were generated using the CCP4 software SUPERPOSE for generation of rotation/translation matrices and MAPUTILS for map generation. **(b)** Superposition of polymyxins shows that the two antibiotics bind in a similar overall conformation.

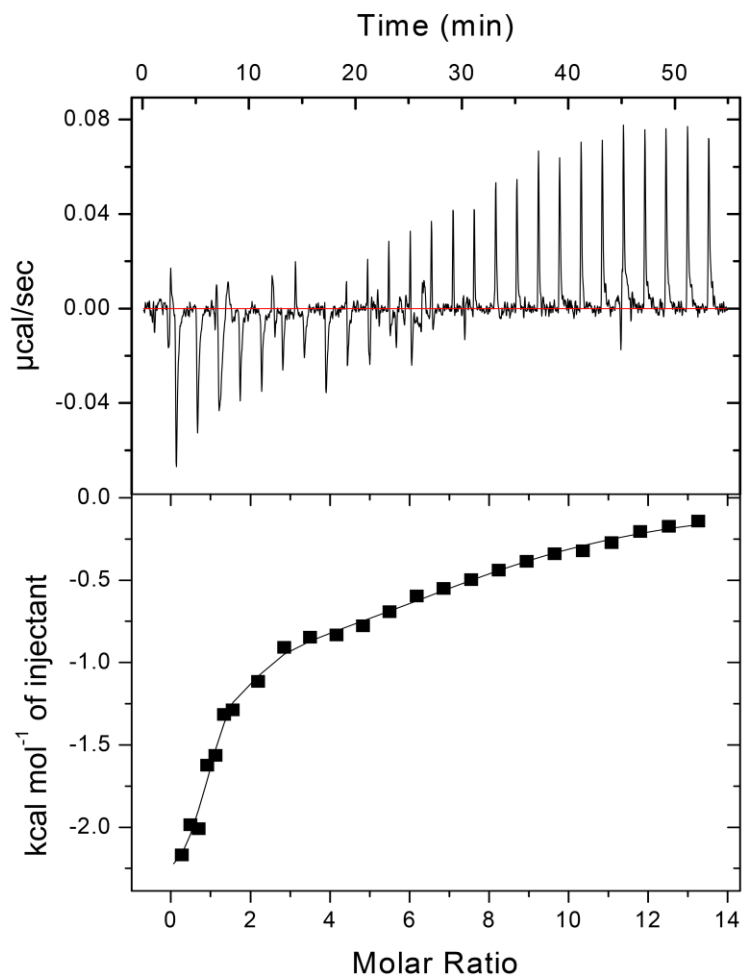

**fig. S3. Characterization of the binding of E11 to LSD1-CoREST in solution by isothermal titration calorimetry.** Calorimetric data of **E11** binding to LSD1-CoREST. Top panel shows the raw heat measured over a series of **E11** injections (1.5 mM). Each signal is integrated as data point and shown in the bottom panel.

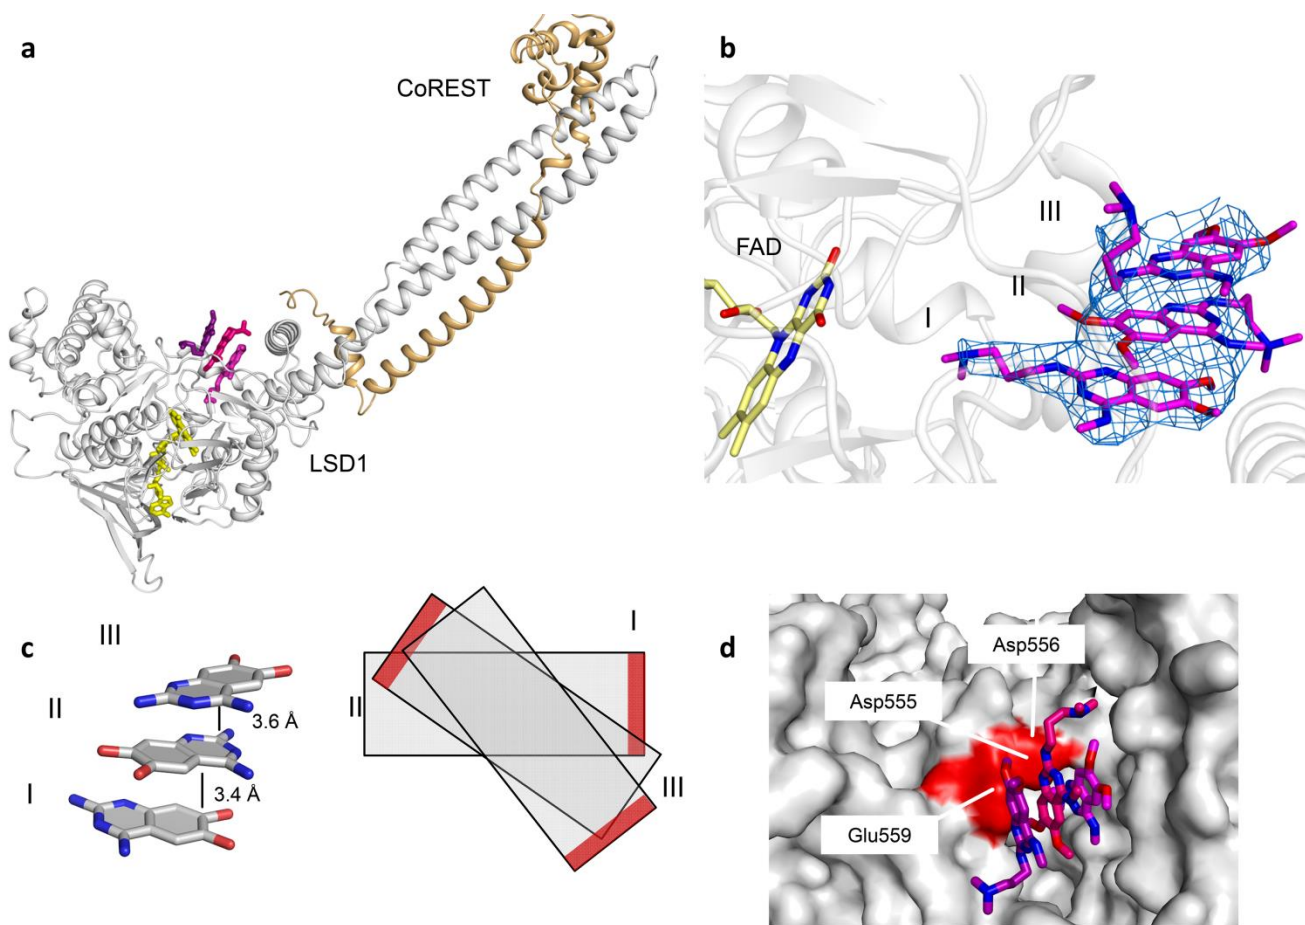

**fig. S4. Noncovalent quinazoline-derived compound MC3767 binds the LSD1 active site in a multiple stacking assembly as E11.** (a) A stack of three inhibitor molecules (magenta sticks) bind the active site of LSD1-CoREST (white and wheat cartoon, respectively) at  $> 5 \text{ \AA}$  from FAD (yellow sticks). (b) Side view of LSD1-CoREST complex with MC3767, showing the inhibitors at the entrance of the binding site. 2Fo-Fc electron density maps ( $1.2 \sigma$  level) are calculated before inclusion of the ligand in the refinement. (c) Simplified views of inhibitor molecules stacking in alternate flipped orientations, with an intermolecular distance of 3.8-4.0  $\text{\AA}$  (side view). Red bars on the right panel indicate the position of the methoxy groups in each ligand. (d) Surface highlight (red) of negatively charged residues of LSD1 that represent the primary binding region for quinazoline MC3767.

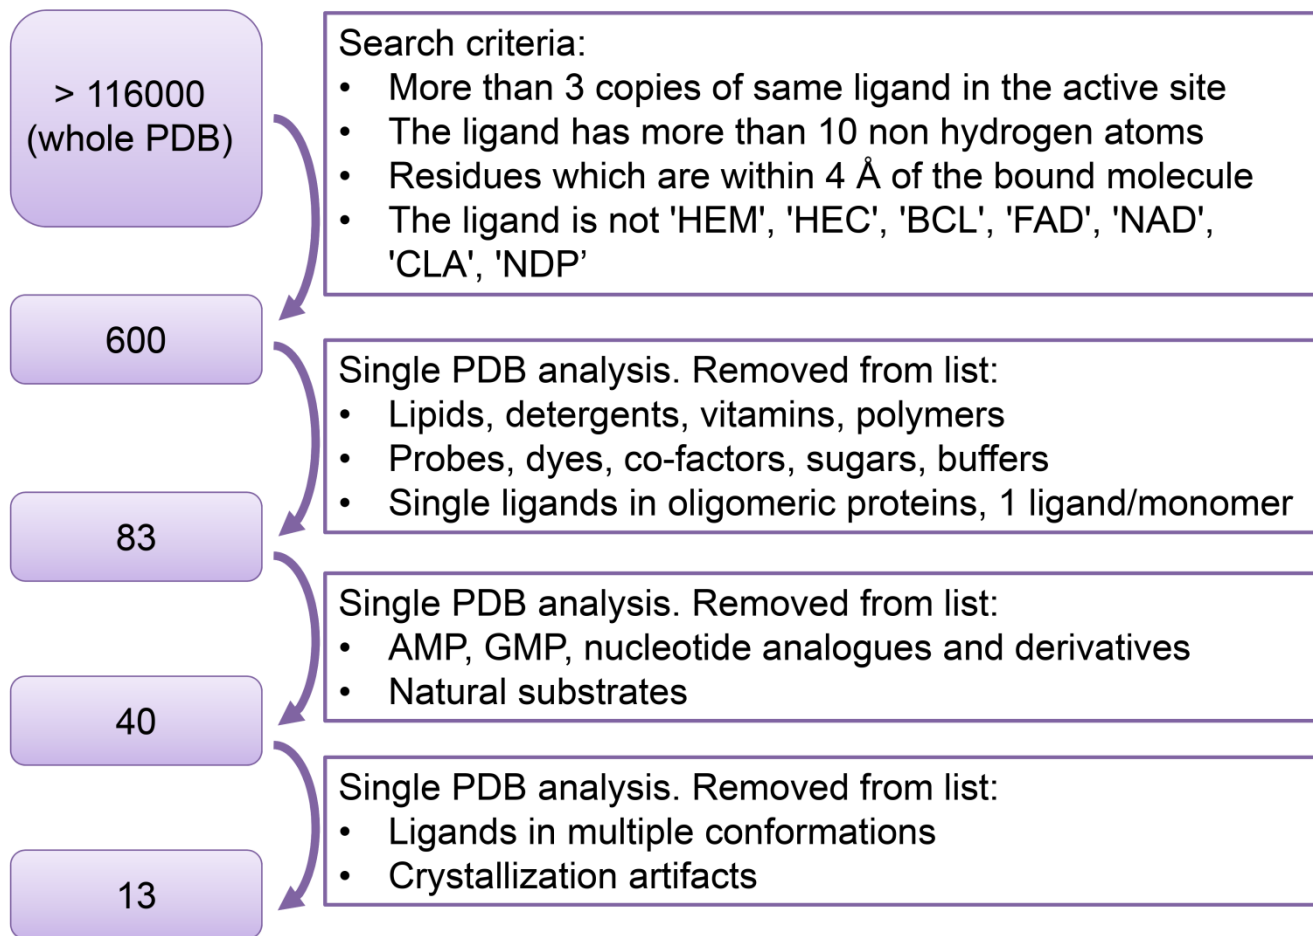

**fig. S5. Workflow of the PDB search of multicopy stacking small-molecule inhibitors.** Numbers in purple boxes refer to the number of PDB structures left for the analysis after each selection step (on the right).

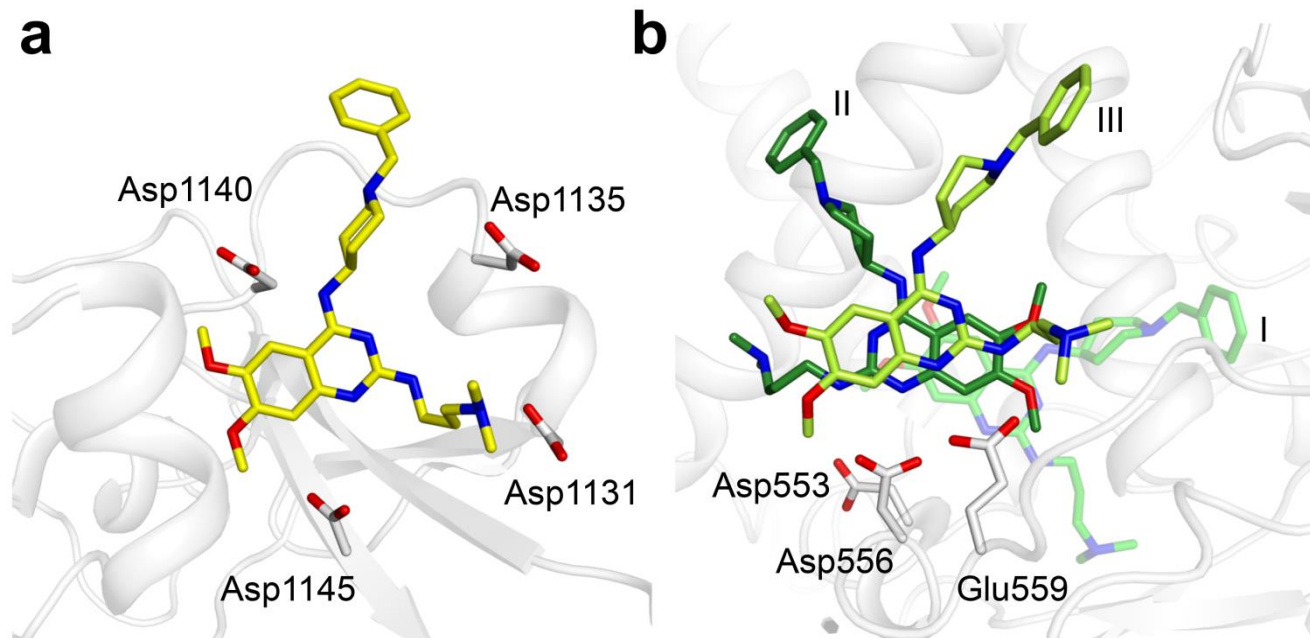

**fig. S6. Comparison of histone methyltransferase G9a-like protein (GLP) and histone demethylase LSD1 in complex with compound E11.** (a) GLP in complex with E11 (PDB 3MO0), which binds in single copy. (b) LSD1-E11 complex, where inhibitor binds in multiple stacking copies. For representation simplicity, ligands IV and V are omitted. Ligands are represented as green (I), forest (II) or lime (III) sticks.

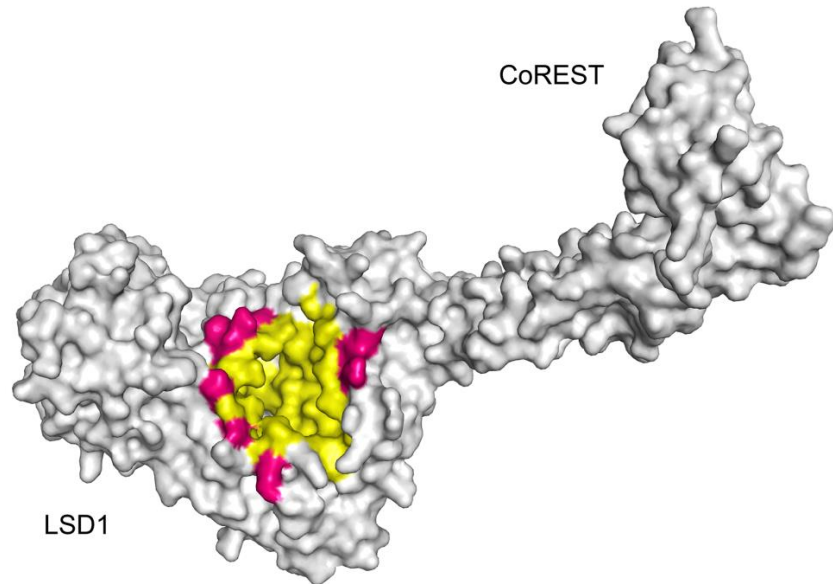

**fig. S7. LSD1 druggable space is expanded by the binding of noncovalent compounds.** Surface representation of LSD1-CoREST (white) and highlight of the extended druggable space (magenta) compared to all of the other LSD1 ligands previously characterized (yellow; table S4).

## Supplementary Tables

table S1. Diffraction, data collection, and refinement statistics.

|                                                     | <b>E11</b><br><b>(5L3E)</b>   | <b>MC3767</b><br><b>(5LBQ)</b> | <b>Polymyxin B</b><br><b>(5L3F)</b> | <b>Polymyxin E</b><br><b>(5L3G)</b> |
|-----------------------------------------------------|-------------------------------|--------------------------------|-------------------------------------|-------------------------------------|
| <b>Data collection</b> <sup>*,†,‡</sup>             |                               |                                |                                     |                                     |
| Space group                                         | I222                          | I222                           | I222                                | I222                                |
| Cell dimensions                                     |                               |                                |                                     |                                     |
| <i>a</i> , <i>b</i> , <i>c</i> (Å)                  | 116.6, 178.4, 233.8           | 120.1, 179.6 234.2             | 119.2, 179.0, 235.8                 | 119.8, 179.5, 237.0                 |
| $\alpha$ , $\beta$ , $\gamma$ (°)                   | 90.0, 90.0, 90.0              | 90.00, 90.00, 90.00            | 90.0, 90.0, 90.0                    | 90.0, 90.0, 90.0                    |
| Resolution range (Å)                                | 97.58 - 2.80<br>(2.87 - 2.80) | 99.85 - 3.30<br>(3.45 - 3.30)  | 49.61 - 3.50<br>(3.69 - 3.50)       | 48.78 - 3.10<br>(3.21 - 3.10)       |
| <i>R</i> <sub>merge</sub>                           | 0.134 (1.377)                 | 0.191 (1.484)                  | 0.161 (1.305)                       | 0.069 (1.423)                       |
| <i>I</i> / $\sigma I$                               | 8.3 (1.1)                     | 5.7 (1.4)                      | 7.7 (1.1)                           | 11.6 (1.1)                          |
| Completeness (%)                                    | 99.8 (99.4)                   | 100.0 (100.0)                  | 99.9 (99.9)                         | 99.7 (99.8)                         |
| Redundancy                                          | 5.0 (5.1)                     | 5.3 (5.6)                      | 4.7 (4.9)                           | 3.5 (3.6)                           |
| <b>Refinement</b> <sup>†</sup>                      |                               |                                |                                     |                                     |
| Resolution (Å)                                      | 2.80                          | 3.30                           | 3.50                                | 3.10                                |
| No. unique reflections                              | 60074 (4388)                  | 38477 (4646)                   | 32150 (4642)                        | 46474 (4510)                        |
| <i>R</i> <sub>work</sub> / <i>R</i> <sub>free</sub> | 0.208/0.227                   | 0.233/0.244                    | 0.186/0.210                         | 0.172/0.197                         |
| No. atoms                                           |                               |                                |                                     |                                     |
| Protein                                             | 6293                          | 6293                           | 6293                                | 6293                                |
| Ligands                                             | 229                           | 122                            | 138                                 | 136                                 |
| Water                                               | 0                             | 0                              | 0                                   | 0                                   |
| Average <i>B</i> -factors (Å <sup>2</sup> )         |                               |                                |                                     |                                     |
| Protein                                             | 72                            | 81                             | 123                                 | 126                                 |
| Ligands <sup>§</sup>                                | 95                            | 95                             | 148                                 | 136                                 |
| Water                                               | -                             | -                              | -                                   | -                                   |
| R.m.s. deviations                                   |                               |                                |                                     |                                     |
| Bond lengths (Å)                                    | 0.013                         | 0.011                          | 0.014                               | 0.015                               |
| Bond angles (°)                                     | 1.79                          | 1.68                           | 1.20                                | 1.66                                |

\* For each structure, one crystal was used and 1 molecule was found in the asymmetric unit.

† Values in parentheses are for reflections in the highest-resolution shell.

‡ The observed resolution limits of the diffraction data were selected by evaluating the mean(*I*) correlation between half-data sets, as defined by Karplus and Diederichs (39)

§ average *B*-factor calculation was carried out excluding all zero-occupancy atoms in the final PDB model.

**table S2. Diffraction, data collection, and refinement statistics for all data sets of polymyxins B and E.**

Data are available for download in the "movies and data" section of the <http://www.unipv.it/biocry> website. (Direct link to data set: [http://www.unipv.it/biocry/data/Speranzini\\_et\\_al\\_LSD1-polymyxin\\_data.zip](http://www.unipv.it/biocry/data/Speranzini_et_al_LSD1-polymyxin_data.zip)).

|                                                     | Polymyxin B<br>(5L3F)         | Polymyxin B<br>(Data set 2)   | Polymyxin B<br>(Data set 3)   | Polymyxin B<br>(Data set 4)   | Polymyxin B<br>(Data set 5)   | Polymyxin B<br>(Data set 6)   |
|-----------------------------------------------------|-------------------------------|-------------------------------|-------------------------------|-------------------------------|-------------------------------|-------------------------------|
| <b>Data collection</b> <sup>*,†,‡</sup>             |                               |                               |                               |                               |                               |                               |
| Space group                                         | I222                          | I222                          | I222                          | I222                          | I222                          | I222                          |
| Cell dimensions                                     |                               |                               |                               |                               |                               |                               |
| <i>a</i> , <i>b</i> , <i>c</i> (Å)                  | 119.2, 179.0, 235.8           | 119.5, 179.7, 236.1           | 119.6, 180.0, 236.3           | 120.6, 181.2, 236.5           | 118.8, 179.0, 235.6           | 120.4, 179.7, 235.3           |
| $\alpha$ , $\beta$ , $\gamma$ (°)                   | 90, 90, 90                    | 90, 90, 90                    | 90, 90, 90                    | 90, 90, 90                    | 90, 90, 90                    | 90, 90, 90                    |
| Resolution range (Å)                                | 49.61 - 3.50<br>(3.69 - 3.50) | 49.34 - 3.00<br>(3.10 - 3.00) | 49.51 - 3.10<br>(3.21 - 3.10) | 49.52 - 3.40<br>(3.57 - 3.40) | 48.83 - 3.10<br>(3.21 - 3.10) | 49.22 - 3.20<br>(3.32 - 3.20) |
| <i>R</i> <sub>merge</sub>                           | 0.161 (1.305)                 | 0.091 (1.599)                 | 0.104 (1.379)                 | 0.162 (1.777)                 | 0.077 (1.322)                 | 0.102 (0.888)                 |
| <i>I</i> / $\sigma$ <i>I</i>                        | 7.7 (1.1)                     | 13.3 (1.1)                    | 8.0 (0.8)                     | 6.4 (1.0)                     | 11.5 (0.9)                    | 8.9 (1.4)                     |
| Completeness (%)                                    | 99.9 (99.9)                   | 99.8 (98.5)                   | 99.8 (99.8)                   | 98.1 (98.1)                   | 99.4 (99.5)                   | 99.8 (99.6)                   |
| Redundancy                                          | 4.7 (4.9)                     | 5.7 (5.7)                     | 3.7 (3.7)                     | 4.0 (3.9)                     | 3.6 (3.5)                     | 3.8 (3.8)                     |
| <b>Refinement</b> <sup>†</sup>                      |                               |                               |                               |                               |                               |                               |
| Resolution (Å)                                      | 3.50                          | 3.00                          | 3.10                          | 3.40                          | 3.10                          | 3.20                          |
| No. unique reflections                              | 32150 (4642)                  | 50914 (4583)                  | 45783 (4444)                  | 35264 (4623)                  | 46272 (4504)                  | 42346 (4366)                  |
| <i>R</i> <sub>work</sub> / <i>R</i> <sub>free</sub> | 0.186/0.210                   | 0.165/0.197                   | 0.167/0.204                   | 0.178/0.199                   | 0.166/0.197                   | 0.213/0.230                   |
| No. atoms                                           | 6431                          | 6431                          | 6429                          | 6429                          | 6429                          | 6431                          |
| Protein                                             | 6293                          | 6293                          | 6289                          | 6291                          | 6289                          | 6293                          |
| Ligands                                             | 138                           | 138                           | 140                           | 140                           | 140                           | 138                           |
| Water                                               | 0                             | 0                             | 0                             | 0                             | 0                             | 0                             |
| Average <i>B</i> -factors (Å <sup>2</sup> )         |                               |                               |                               |                               |                               |                               |
| Protein                                             | 123                           | 109                           | 110                           | 133                           | 114                           | 100                           |
| Ligands <sup>§</sup>                                | 148                           | 142                           | 140                           | 155                           | 146                           | 127                           |
| Water                                               | -                             | -                             | -                             | -                             | -                             | -                             |
| R.m.s. deviations                                   |                               |                               |                               |                               |                               |                               |
| Bond lengths (Å)                                    | 0.014                         | 0.011                         | 0.010                         | 0.010                         | 0.010                         | 0.015                         |
| Bond angles (°)                                     | 1.20                          | 1.17                          | 1.30                          | 1.34                          | 1.28                          | 1.23                          |



|                                                     | Polymyxin E<br>(5L3G)         | Polymyxin E<br>(Data set 2)   | Polymyxin E<br>(Data set 3)   | Polymyxin E<br>(Data set 4)   | Polymyxin E<br>(Data set 5)   |
|-----------------------------------------------------|-------------------------------|-------------------------------|-------------------------------|-------------------------------|-------------------------------|
| <b>Data collection</b> <sup>*,†,‡</sup>             |                               |                               |                               |                               |                               |
| Space group                                         | I222                          | I222                          | I222                          | I222                          | I222                          |
| Cell dimensions                                     |                               |                               |                               |                               |                               |
| <i>a</i> , <i>b</i> , <i>c</i> (Å)                  | 119.8, 179.5, 237.0           | 120.4, 179.8, 235.9           | 118.8, 179.1, 238.0           | 119.4 178.2 235.4             | 118.8, 179.1, 238.0           |
| $\alpha$ , $\beta$ , $\gamma$ (°)                   | 90, 90, 90                    | 90, 90, 90                    | 90, 90, 90                    | 90, 90, 90                    | 90, 90, 90                    |
| Resolution range (Å)                                | 48.78 - 3.10<br>(3.21 - 3.10) | 49.31 - 3.20<br>(3.32 - 3.20) | 49.56 - 3.10<br>(3.21 - 3.10) | 49.10 - 3.30<br>(3.45 - 3.30) | 49.22 - 3.50<br>(3.69 - 3.50) |
| <i>R</i> <sub>merge</sub>                           | 0.069 (1.423)                 | 0.077 (1.005)                 | 0.097 (2.000)                 | 0.134 (1.375)                 | 0.138 (1.271)                 |
| <i>I</i> / $\sigma$ <i>I</i>                        | 11.6 (1.1)                    | 9.8 (1.3)                     | 10.0 (0.9)                    | 7.3 (1.2)                     | 8.9 (1.6)                     |
| Completeness (%)                                    | 99.7 (99.8)                   | 99.5 (99.8)                   | 99.4 (99.8)                   | 99.4 (99.4)                   | 99.5 (99.5)                   |
| Redundancy                                          | 3.5 (3.6)                     | 3.4 (3.6)                     | 4.0 (4.1)                     | 3.7 (3.8)                     | 4.6 (4.9)                     |
| <b>Refinement</b> <sup>†</sup>                      |                               |                               |                               |                               |                               |
| Resolution (Å)                                      | 3.10                          | 3.20                          | 3.10                          | 3.30                          | 3.50                          |
| No. unique reflections                              | 46474 (4510)                  | 42284 (4394)                  | 46019 (4503)                  | 37819 (4559)                  | 31434 (4536)                  |
| <i>R</i> <sub>work</sub> / <i>R</i> <sub>free</sub> | 0.172/0.197                   | 0.176/0.196                   | 0.184/0.208                   | 0.181/0.212                   | 0.196/0.227                   |
| No. atoms                                           | 6429                          | 6429                          | 6429                          | 6429                          | 6429                          |
| Protein                                             | 6293                          | 6293                          | 6293                          | 6293                          | 6293                          |
| Ligands                                             | 136                           | 136                           | 136                           | 136                           | 136                           |
| Water                                               | 0                             | 0                             | 0                             | 0                             | 0                             |
| Average <i>B</i> -factors (Å <sup>2</sup> )         |                               |                               |                               |                               |                               |
| Protein                                             | 126                           | 132                           | 126                           | 120                           | 141                           |
| Ligands <sup>§</sup>                                | 136                           | 147                           | 139                           | 133                           | 147                           |
| Water                                               | -                             | -                             | -                             | -                             | -                             |
| R.m.s. deviations                                   |                               |                               |                               |                               |                               |
| Bond lengths (Å)                                    | 0.015                         | 0.009                         | 0.009                         | 0.009                         | 0.004                         |
| Bond angles (°)                                     | 1.66                          | 1.29                          | 1.22                          | 1.26                          | 0.73                          |

\* For each structure, one crystal was used and 1 molecule was found in the ASU

† Values in parentheses are for reflections in the highest-resolution shell.

‡ The observed resolution limits of the diffraction data were selected by evaluating the mean(*I*) correlation between half-sets, as defined by Karplus and Diederichs (39)

§ average B-factor calculation was carried out excluding all zero-occupancy atoms in the final PDB model.

**table S3. List of protein-inhibitor structures displaying multiple stacking conformation identified from PDB search.**

| PDB ID         | Protein                                        | Ligand ID   | Ligand name and type                                           | Biological Assembly | Total ligand number per biological assembly | Stacking ligand copies per biological assembly | Reference |
|----------------|------------------------------------------------|-------------|----------------------------------------------------------------|---------------------|---------------------------------------------|------------------------------------------------|-----------|
| 1WRL ,<br>1WRK | Troponin C                                     | TFP         | Trifluoperazine<br>(antipsychotic and antiemetic drug)         | homodimer*          | 4                                           | 4                                              | n.a. ‡    |
| 2A3A           | Chitinase                                      | TEP         | Theophylline<br>(respiratory diseases treatment)               | monomer*            | 4                                           | 2                                              | (40)      |
| 2D41           | RNA-dependent<br>RNA polymerase<br>NS5B        | SNH         | Oligotiophene derivative<br>(non-nucleoside inhibitor)         | monomer*            | 2                                           | 2                                              | (41)      |
| 2FIX           | Fructose-1,6-<br>biphosphatase                 | 870         | Benzenesulfonamide analogue<br>(allosteric inhibitor)          | homotetramer*       | 4                                           | 2                                              | (42)      |
| 2V0M           | Cytochrome 3A4                                 | KLN         | Ketoconazole<br>(antimitotic)                                  | homotetramer*       | 8                                           | 2                                              | (43)      |
| 3IPY           | Deoxycytidine<br>Kinase                        | B87         | Oligotiophene derivative<br>(cyclopentane analogue)            | homodimer*          | 4                                           | 2                                              | (44)      |
| 4BFQ           | Acetylcholine<br>binding protein               | 083         | Isoquinoline derivative<br>(antimycoplasmal agent)             | homopentamer*       | 14                                          | 3†                                             | (22)      |
| 4DBS           | Aldo-keto<br>reductase AKR1C3                  | 0HV         | Flufenamic acid analogue<br>(small molecule antagonist)        | monomer*            | 2                                           | 2                                              | (45)      |
| 4JLJ, 4JLK     | Deoxycytidine<br>kinase                        | 1NM,<br>1NO | Pyrimidine-thiazole derivatives<br>(small molecule inhibitors) | homodimer*          | 4                                           | 2                                              | (46)      |
| 4O4R           | Norovirus RNA-<br>dependent RNA-<br>polymerase | 20V         | PPNDS<br>(8'-disulfonic acid)                                  | homohexamer*        | 12                                          | 2                                              | (47)      |

\* Analysis was performed using EBI PISA

†At the B-C subunit interface, only 2 molecules were found

‡ n.a. Not available

table S4. List of published LSD1 PDB structures in complex with ligands.

| PDB ID                                                   | Ligand ID/Chain              | Ligand type                          | Resolution (Å)                         | References |
|----------------------------------------------------------|------------------------------|--------------------------------------|----------------------------------------|------------|
| <b>Irreversible inhibitors: covalent adduct on FAD</b>   |                              |                                      |                                        |            |
| 2EJR, 2UXX, 2Z5U                                         | F2N, FAJ, FAJ                | Tranlycypromine                      | 2.7, 2.7, 2.3                          | (48, 49)   |
| 2XAF, 2XAG, 2XAH, 2XAJ, 2XAQ, 2XAS                       | TCF, TCF, 3PL, TCA, M84, M80 | Tranlycypromine analogues            | 3.25, 3.1, 3.1, 3.3, 3.2, 3.2          | (18)       |
| 3ABT, 3ABU                                               | 2PF, 12F                     | Tranlycypromine analogues            | 3.2, 3.1                               | (50)       |
| 4UV8, 4UV9, 4UVA, 4UVB, 4UVC                             | D69, D70, D73, D51, D52      | Tranlycypromine analogues            | 2.8, 3.0, 2.9, 2.8, 3.1                | (51)       |
| 4UXN                                                     | M8A                          | Tranlycypromine analogue             | 2.9                                    | (52)       |
| 2UXN                                                     | Chain E                      | Histone H3-derived peptide, modified | 2.7                                    | (53)       |
| <b>Reversible inhibitors: substrate mimic</b>            |                              |                                      |                                        |            |
| 2V1D                                                     | Chain C                      | Histone H3-derived peptide           | 3.1                                    | (6)        |
| 2Y48                                                     | Chain C                      | SNAIL1-derived peptide*              | 3.0                                    | (25)       |
| 3ZMS, 3ZMT, 3ZMU, 3ZMV, 3ZMZ, 3ZN0, 3ZN1                 | Chain C                      | SNAIL1 and INSM1-derived peptides*†  | 3.0, 3.1, 3.2, 3.0, 3.0, 3.0, 2.8, 3.1 | (54)       |
| <b>Reversible inhibitors: newly identified compounds</b> |                              |                                      |                                        |            |
| 5L3E                                                     | E11                          | Small-molecule inhibitor             | 2.8                                    | This work  |
| 5LBQ                                                     | 767                          | Small-molecule inhibitor             | 3.3                                    | This work  |
| 5L3F                                                     | Chain C                      | Cyclic peptide                       | 3.5                                    | This work  |
| 5L3G                                                     | Chain C                      | Cyclic peptide                       | 3.1                                    | This work  |
| <b>Non-competitive inhibitors: nucleic acid</b>          |                              |                                      |                                        |            |
| 4XBF                                                     | Chain D                      | RNA oligonucleotide                  | 2.8                                    | (55)       |

\* SNAIL1, zinc finger transcription factor SNAIL1

† INSM1, Insulinoma-associated protein 1, transcription regulator
